# Supplementary material for: In-vivo Dynamics of the Human Hippocampus across the Menstrual Cycle
Source: PubMed Central journal article supplement (PMC5054394; doi:10.1038/srep32833), 2016-10-07
Supplement: srep32833-s1.pdf [file srep32833-s1.pdf]

*In-vivo Dynamics of the Human Hippocampus across the Menstrual Cycle*

Claudia Barth<sup>1\*</sup>, Christopher J Steele<sup>1,2</sup>, Karsten Mueller<sup>1</sup>, Vivien P Rekkas<sup>3</sup>, Katrin Arelin<sup>1,4,5</sup>, Andre Pampel<sup>1</sup>, Inga Burmann<sup>1</sup>, Jürgen Kratzsch<sup>6</sup>, Arno Villringer<sup>1,4,5,7,8</sup>, Julia Sacher<sup>1,4</sup>.

<sup>1</sup> Department of Neurology, Max Planck Institute for Human Cognitive and Brain Sciences, Leipzig, Germany; <sup>2</sup> Cerebral Imaging Centre, Douglas Mental Health Institute, Department of Psychiatry, McGill University, Montreal, Canada; <sup>3</sup> CAMH Research Imaging Centre and Campbell Family Mental Health Research Institute at the Centre for Addiction and Mental Health and the Department of Psychiatry, University of Toronto, Toronto, Canada; <sup>4</sup> Clinic of Cognitive Neurology, University of Leipzig, Leipzig, Germany; <sup>5</sup> Leipzig Research Center for Civilization Diseases, University of Leipzig, Germany; <sup>6</sup> Institute for Laboratory Medicine, Clinical Chemistry and Molecular Diagnostics, University Hospital Leipzig, Leipzig, Germany; <sup>7</sup> Integrated Research and Treatment Center Adiposity Diseases, University of Leipzig, Germany; <sup>8</sup> Berlin School of Mind and Brain, Mind and Brain Institute, Berlin, Germany.

**S1 Overview of Data made openly available according to the Committee on Best Practice in Data Analysis and Sharing (COBIDAS) guidelines as published by the Organization for Human Brain Mapping**

(<http://biorxiv.org/content/early/2016/05/20/054262>).

| Aspect                                                | Notes                                                                                                                                                                                                                                                                                                                                                                                                    |
|-------------------------------------------------------|----------------------------------------------------------------------------------------------------------------------------------------------------------------------------------------------------------------------------------------------------------------------------------------------------------------------------------------------------------------------------------------------------------|
| <b>Shared material with corresponding data format</b> | Unthresholded t- and corrected p-maps of DWI data (bilateral hippocampus, contrast 1 for estrogen; corresponding to Figure 2) <ul style="list-style-type: none"> <li>- Hipp_L_estrogen_DWI_tfce_corrp_tstat1_78014.nii.gz</li> <li>- Hipp_L_estrogen_DWI_tstat1_78014.nii.gz</li> <li>- Hipp_R_estrogen_DWI_tfce_corrp_tstat1_78014.nii.gz</li> <li>- Hipp_R_estrogen_DWI_tstat1_78014.nii.gz</li> </ul> |
|                                                       | Unthresholded t- and corrected p-maps of VBM data (bilateral hippocampus, contrast 1 for estrogen; corresponding to Figure 3) <ul style="list-style-type: none"> <li>- Hipp_L_estrogen_VBM_tfce_corrp_tstat1_78014.nii.gz</li> <li>- Hipp_L_estrogen_VBM_tstat1_78014.nii.gz</li> <li>- Hipp_R_estrogen_VBM_tfce_corrp_tstat1_78014.nii.gz</li> <li>- Hipp_R_estrogen_VBM_tstat1_78014.nii.gz</li> </ul> |
| <b>URL, access information</b>                        | Neurovault: public repository providing open access to functional and structural data on the human brain:<br><a href="http://neurovault.org/collections/1543/">http://neurovault.org/collections/1543/</a>                                                                                                                                                                                               |
| <b>Ethics compliance</b>                              | Study and recruitment procedures were carried out in accordance with the Declaration of Helsinki and approved by the research ethics board of the University of Leipzig (EK-No.: 246—2009—09112009).                                                                                                                                                                                                     |

\*<sup>1</sup> VBM = voxel-based morphometry, \*<sup>2</sup> DWI = diffusion-weighted imaging
